# Supplementary material for: Rhythmic, diurnal, neural, and behavioral activity in the solitary ascidian (Chordata, Ascidiacea) Styela plicata
Source: Research Square preprint supplement (doi:10.21203/rs.3.rs-5971694/v1), 2025-09-30
Supplement: Supplementary file 1 [file a398b058f9774f8c22bc17b9.pdf]

# 1 Supplementary material

2

3 **Table S1.** Summary of the experimental conditions, the measured factor, and the F-tests p-  
4 value assessing the alignment of experimental rhythmicity with the 24-hour cosinor model  
5 calculation.

| Individual serial number | Experiment                       | Type of measurement       | P-value        | Color code   |
|--------------------------|----------------------------------|---------------------------|----------------|--------------|
| 1'                       | 24-hours – baseline- no stimulus | Normalized siphon opening | 0.008          | Blue-dashed  |
| 2'                       | 24-hours – baseline- no stimulus | Normalized siphon opening | 0.04           | Green-dashed |
| 3'                       | 24-hours – baseline- no stimulus | Normalized siphon opening | -              | Gray         |
| 5'                       | 24-hours – baseline- no stimulus | Normalized siphon opening | 0.51           | Orange       |
| 6'                       | 24-hours – baseline- no stimulus | Normalized siphon opening | 0.0004         | Black-dashed |
| 8'                       | 24-hours – baseline- no stimulus | Normalized siphon opening | $2*10^{-5}$    | Cyan-dashed  |
| 9'                       | 24-hours – baseline- no stimulus | Normalized siphon opening | $2.86*10^{-7}$ | Red-dashed   |
| 4                        | 24-hours stimulus every 2 hours  | Normalized siphon opening | $1.9*10^{-5}$  | Blue         |
| 5                        | 24-hours stimulus every 2 hours  | Normalized siphon opening | 0.02           | Black        |
| 6                        | 24-hours stimulus every 2 hours  | Normalized siphon opening | $4.76*10^{-5}$ | Green        |
| 7                        | 24-hours stimulus every 2 hours  | Normalized siphon opening | 0.7            | Orange       |
| 8                        | 24-hours stimulus every 2 hours  | Normalized siphon opening | $1.68*10^{-5}$ | Cyan         |
| 9                        | 24-hours stimulus every 2 hours  | Normalized siphon opening | -              | -            |
| 10                       | 24-hours stimulus every 2 hours  | Normalized siphon opening | -              | -            |
| 4                        | Stimulation every two hours      | Recovery time             | 0.3            | Blue         |
| 5                        | Stimulation every two hours      | Recovery time             | 0.007          | Black        |
| 6                        | Stimulation every two hours      | Recovery time             | $4*10^{-4}$    | Green        |
| 7                        | Stimulation every two hours      | Recovery time             | 0.64           | Orange       |
| 8                        | Stimulation every two hours      | Recovery time             | 0.9            | Cyan         |

6  
7  
8  
9  
10  
11  
12  
13  
14  
15  
16  
17  
18

|    |                             |                                             |       |        |
|----|-----------------------------|---------------------------------------------|-------|--------|
| 9  | Stimulation every two hours | Recovery time                               | 0.005 | Purple |
| 10 | Stimulation every two hours | Recovery time                               | -     | Pink   |
| 4  | Stimulation every two hours | Electrophysiology (activity in 200 seconds) | 0.8   | Blue   |
| 5  | Stimulation every two hours | Electrophysiology (activity in 200 seconds) | 0.12  | Black  |
| 6  | Stimulation every two hours | Electrophysiology (activity in 200 seconds) | 0.22  | Green  |
| 7  | Stimulation every two hours | Electrophysiology (activity in 200 seconds) | 0.7   | Orange |
| 8  | Stimulation every two hours | Electrophysiology (activity in 200 seconds) | 0.9   | Cyan   |
| 9  | Stimulation every two hours | Electrophysiology (activity in 200 seconds) | -     | -      |
| 10 | Stimulation every two hours | Electrophysiology (activity in 200 seconds) | -     | -      |

**Table S2.** Summary of the experimental conditions and the p-value for each spike type rhythmicity alignment with the 24-hour cosinor model calculation. Two values are presented when the experiment was run twice during separate 24-hour periods.

23  
24

**Table S3.** BLAST analysis of *Styela clava* candidate clock-gene homologs. Highly similar hits were retrieved with MegaBLAST, while more divergent hits were retrieved with Discontiguous MegaBLAST (BLASTn). Hits with E-value  $> 1 \times 10^{-5}$  or query coverage  $< 20\%$  were excluded as below our biological significance thresholds.

| Gene Name               | Source       | Level of BLAST                                      | Max Score | Total Score | Query Cover | E value   | Per. Ident | Acc. Len | Comments                                                    |
|-------------------------|--------------|-----------------------------------------------------|-----------|-------------|-------------|-----------|------------|----------|-------------------------------------------------------------|
| Casein Kinase I epsilon | Ciona genome | More dissimilar sequences (discontiguous megablast) | 737       | 737         | 27%         | 0         | 78.17%     | 2216     | The genes with the highest similarity to the human sequnace |
| E4BP4                   |              |                                                     | 49.1      | 49.1        | 8%          | 1.00E-08  | 71.28%     | 3616     |                                                             |
| FWD1                    |              |                                                     | 870       | 870         | 55%         | 0         | 74.25%     | 2549     |                                                             |
| HLF                     |              |                                                     | 58.1      | 58.1        | 9%          | 4.00E-11  | 66.49%     | 3170     |                                                             |
| rev-erb                 |              |                                                     | 56.3      | 56.3        | 2%          | 2.00E-10  | 75.64%     | 2676     | to LOC120325544                                             |
| ROR-A                   |              |                                                     | 215       | 336         | 33%         | 1.00E-58  | 73.00%     | 3791     |                                                             |
| RXR                     |              |                                                     | 372       | 372         | 50%         | 5.00E-106 | 68.33%     | 4312     |                                                             |
| BMAL1                   | Human genome | N/A                                                 |           |             |             |           |            |          |                                                             |
| BMAL2                   |              |                                                     |           |             |             |           |            |          |                                                             |
| CLOCK                   |              |                                                     |           |             |             |           |            |          |                                                             |
| CRY1                    |              |                                                     |           |             |             |           |            |          |                                                             |
| CRY2                    |              |                                                     |           |             |             |           |            |          |                                                             |
| PER1                    |              |                                                     |           |             |             |           |            |          |                                                             |
| PER2                    |              |                                                     |           |             |             |           |            |          |                                                             |
| PER3                    |              |                                                     |           |             |             |           |            |          |                                                             |

29

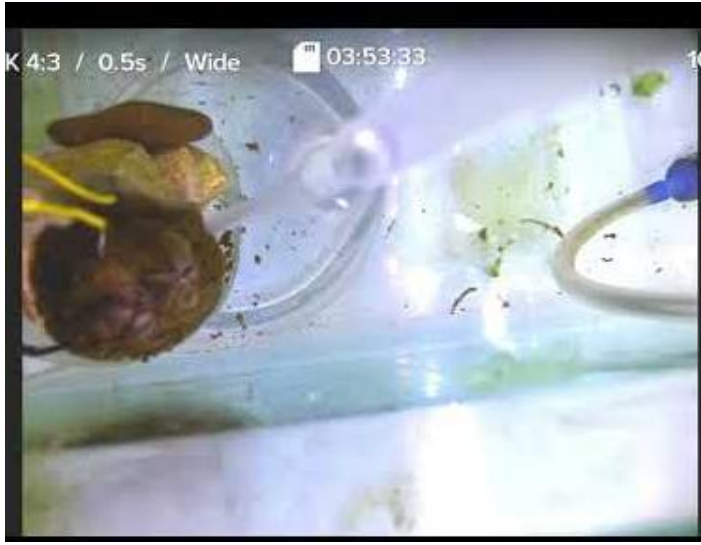

30

31 **Video S1.** An example of stimulating *S. plicata* while recording behavior and  
32 electrophysiology (also be accessed via the following link:

33 <https://www.youtube.com/embed/IFIwt42Edg8?feature=oembed>).

34

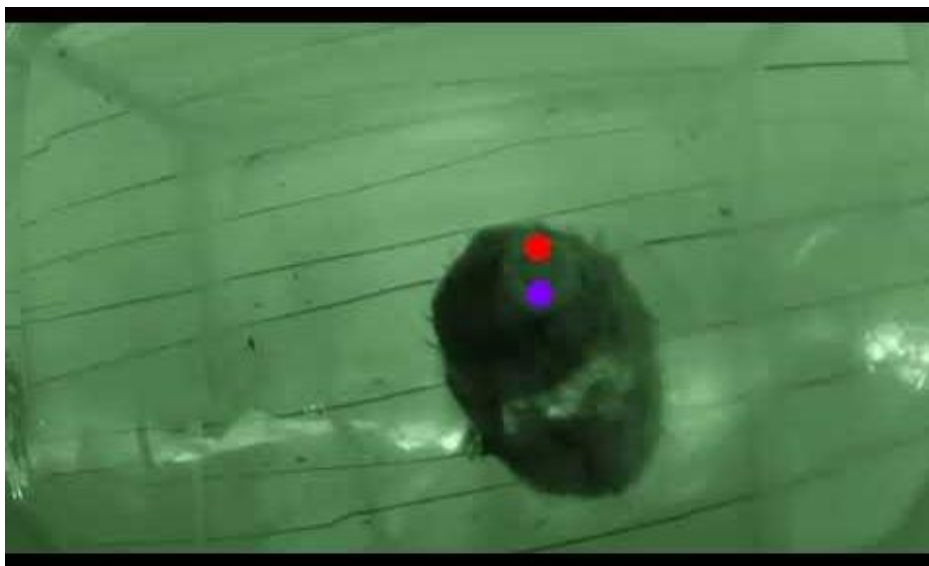

35

36

37 **Video S2. Two-minute (downsampled) recording of siphon movement and**  
38 **tracking.** The video was part of the baseline behavior recordings, and includes no  
39 tactile stimulation in the experiment. The video includes a light transition, during  
40 which no behavioral response is observed (also be accessed via the following link:  
41 <https://youtu.be/MCawKs2iVSs>).

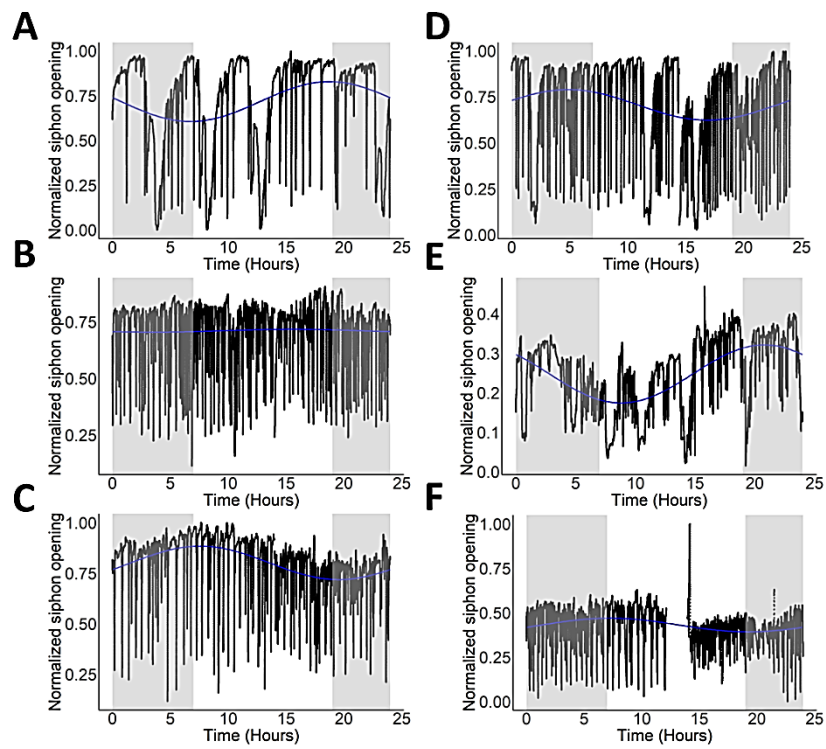

42

43 **Figure S1. Cosinor fitting for behavioral analysis.** Individuals normalized siphon  
 44 opening of 1'-2', 5'-9' are presented (black). Cosinor fitting is presented in blue. Gray  
 45 shading indicates the night period  
 46

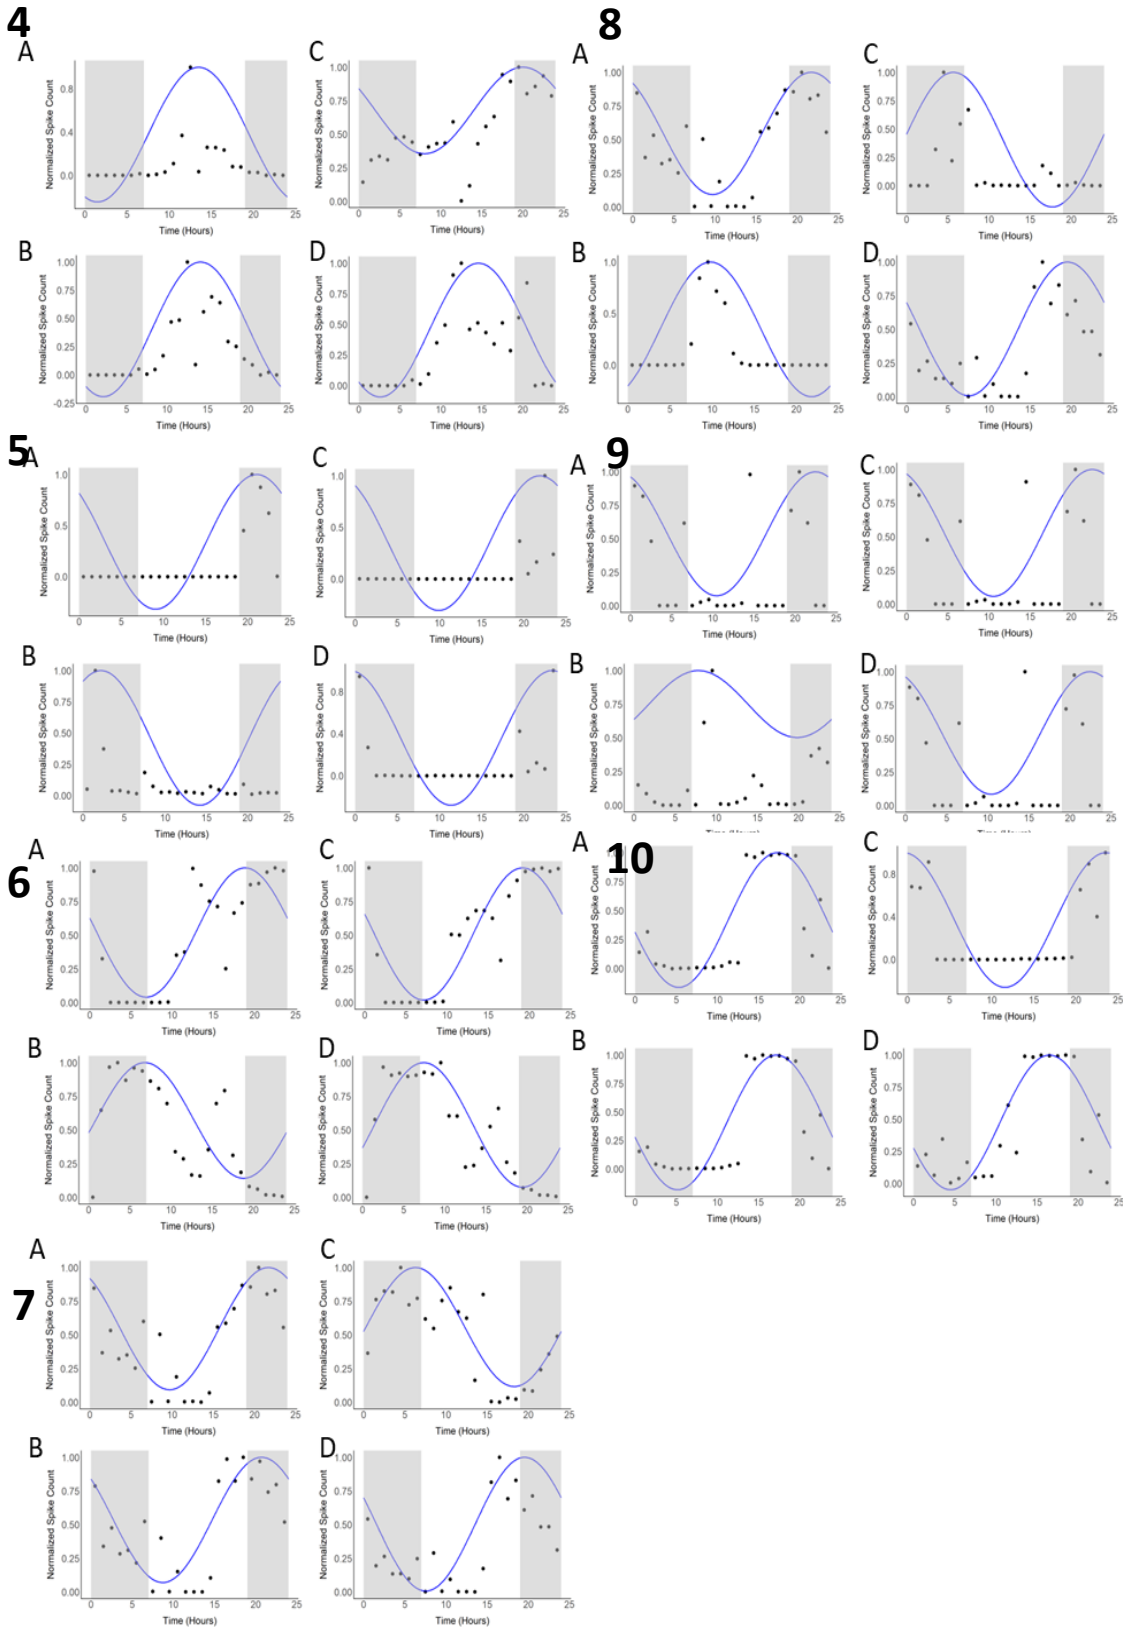

**Figure S2. Cosinor fitting for spike analysis 24-hours.** Individuals 4-10 are presented with each point represents 1 hour bin and each panel A-D represents spike type 1-4 respectively. Gray shading indicates the night period

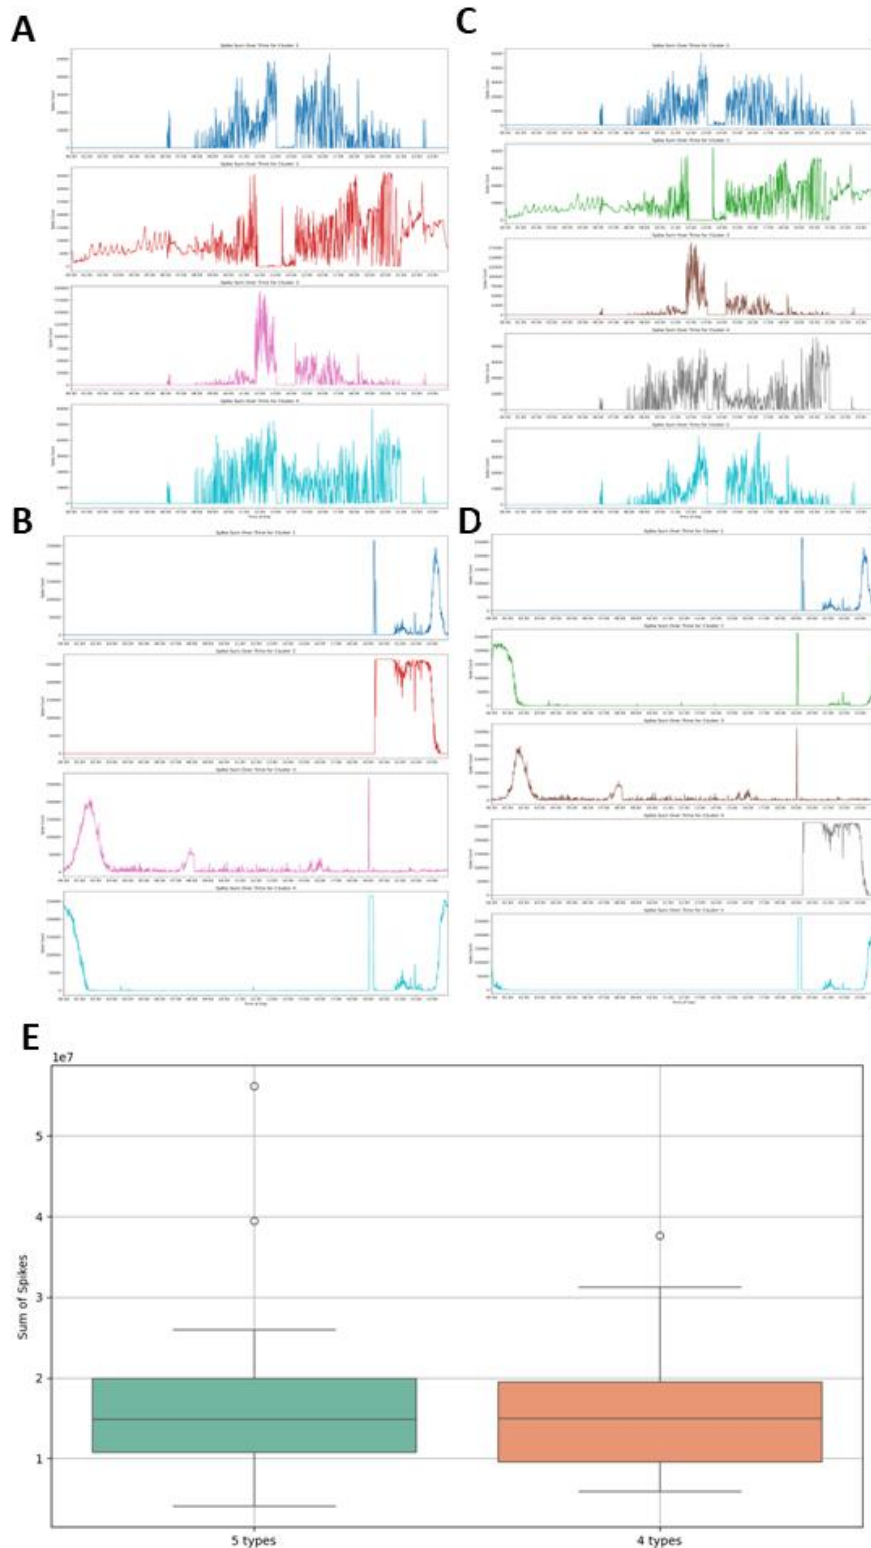

**Figure S3. Comparison of raw spike counts using four- and five-type classifications.** A&C): Spike count data from animal 4, displayed with four-type (A) and five-type (C) classifications. B&D) Spike count data from animal 5, divided into four types(B) and five-type (D) classifications. E) Total spike counts summed across all animals over a 24-hour period. While using a valley-seeking algorithm to decide how many spike types we have. This figure present visually that 5 types doesn't change the analysis significantly.

59  
60

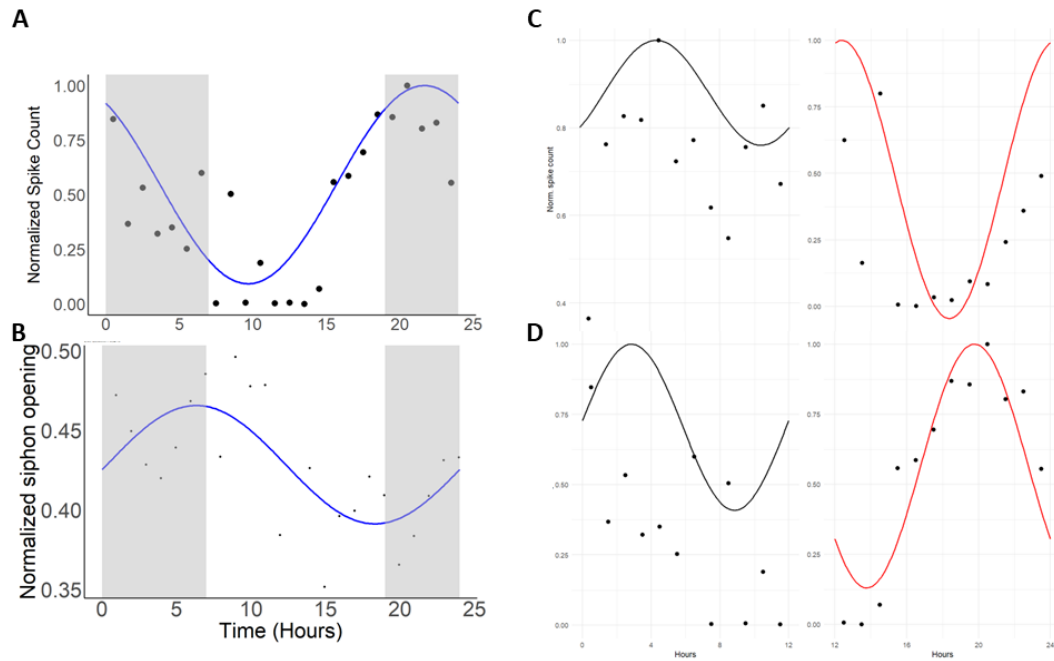

61  
62 **Figure S4. Comparison of 24-hour and 12-hour cycles in spike and behavioral**  
63 **data.** A) Type 1 spike count from animal 4, analyzed over a 24-hour cycle. B)  
64 Behavioral data from animal 9', analyzed over a 24-hour cycle. C) Type 1 spike count  
65 from animal 4, analyzed over a 12-hour cycle (same data as in A). D) Behavioral data  
66 from animal 9', analyzed over a 12-hour cycle (same data as in B).  
67



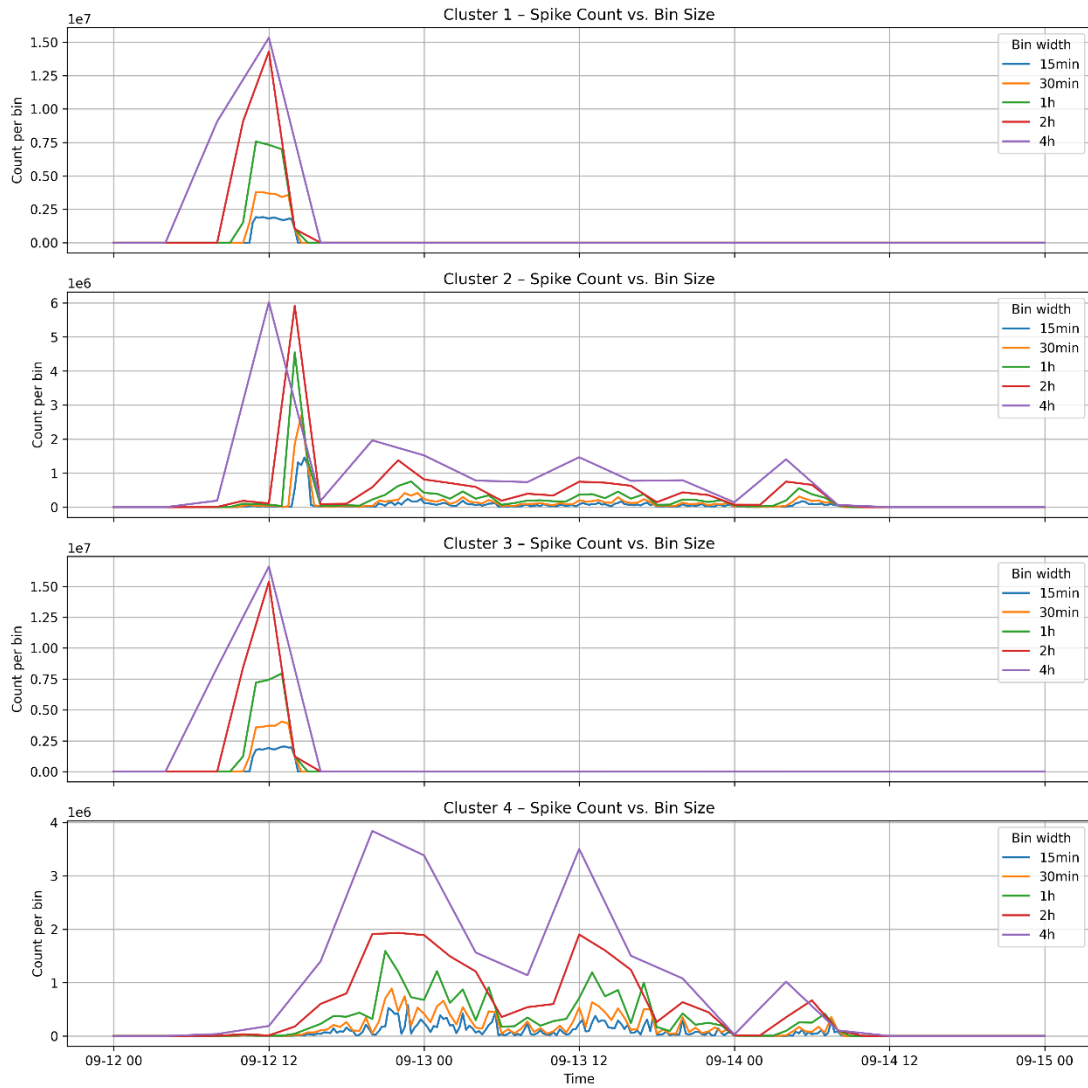

**Figure S5. An example of bin-size sensitivity analysis across 48-hours recordings (experiment IV, animal 1) in the 4 spike types.** We chose a 1-hour bin width for primary analyses, as it provided a balance between temporal resolution and noise reduction. Key trends were consistent across 1–2 hour bins, but smaller bins exhibited excessive variability and larger bins obscured event timing.

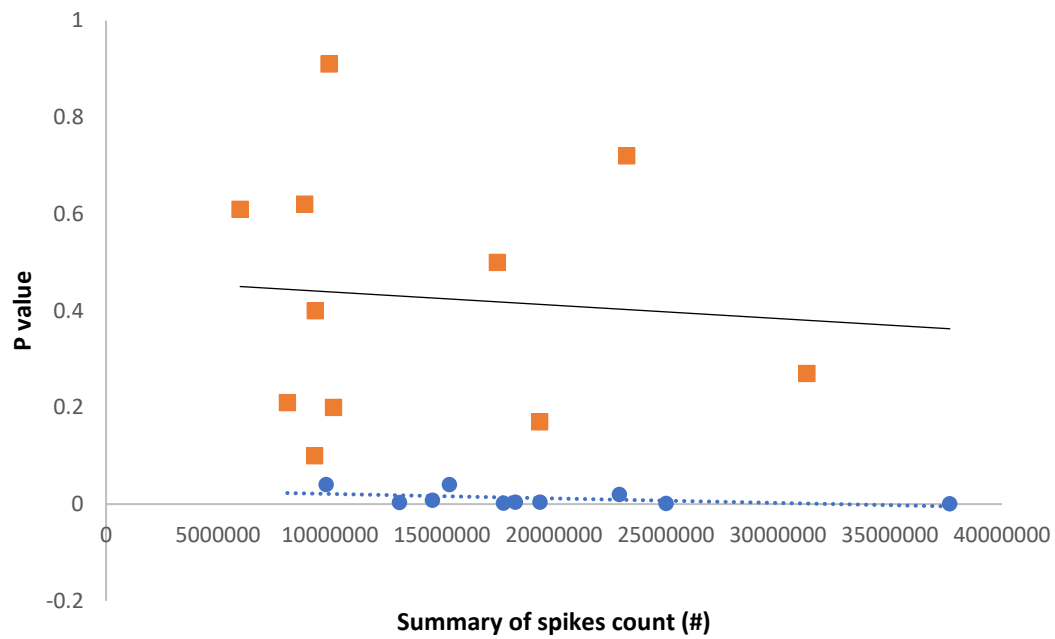

**Figure S6. Significance of cosinor analysis as a function of total spike count per measurement.** In general, recordings with higher spike counts showed more significant rhythmic trends. Orange indicates non-significant recordings ( $p > 0.05$ ), while blue indicates significant recordings ( $p < 0.05$ ).
